# Supplementary material
Source: MDPI journal article supplement (https://www.mdpi.com/2311-7524/7/10/384)
Supplement: s1 [file s1]

## Supplementary

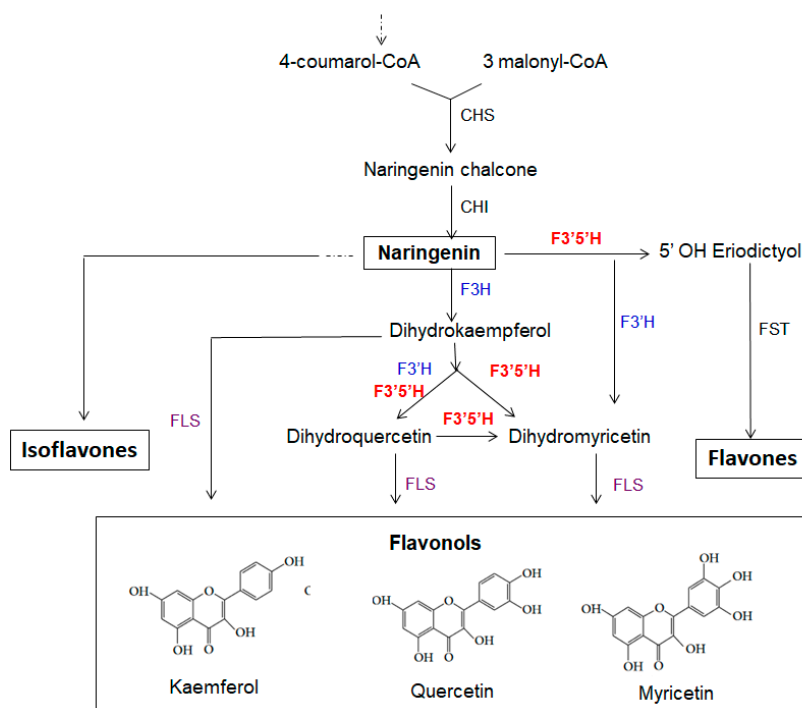

**Figure S1.** Flavonoid biosynthesis in plants (redrawn from [1-3]. CHS: chalcone synthase; CHI: chalcone isomerase; F3H: flavone 3-hydroxylase; F3'H: flavonoid 3'-hydroxylase; F3'5'H: flavonoid 3',5'-hydroxylase; FLS: flavonol synthase; FST: flavonol 4-sulfotransferase.

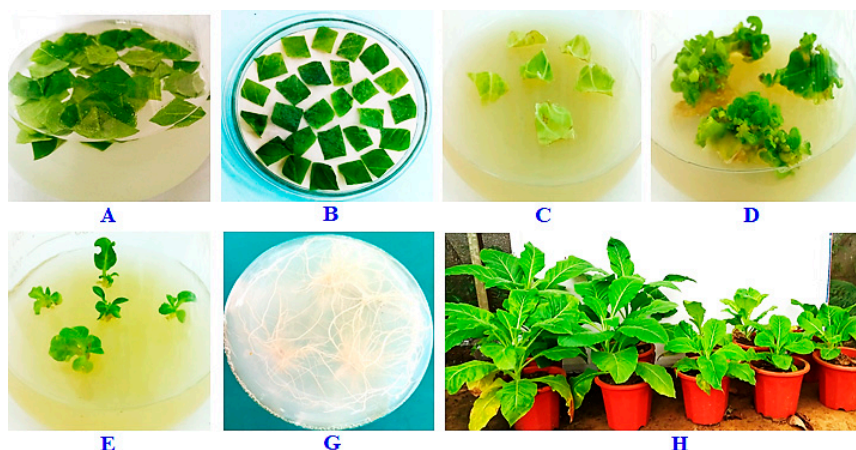

**Figure S2.** *AcF3'5'H* transgene transformation via *A. tumefaciens* and *in vitro* generation of the transgenic tobacco plants. (A) Leaf fragments infected using *A. tumefaciens* contain a *35S\_AcF3'5'H\_cmyc\_KDEL* structure; (B) Transformed samples were transferred to CCM, in the dark; (C) The transformed samples cultured on SIM, including basic MS, 1.0 mg L<sup>-1</sup> BAP, 30 g L<sup>-1</sup> sucrose, 9.0 g L<sup>-1</sup> agar, with the addition of 500 mg L<sup>-1</sup> cefotaxime, and 50 mg L<sup>-1</sup> kanamycin; (D) Transformed samples were regenerated multiple shoots on SIM; (E) The shoots were removed from the samples and transferred to shoot-growing medium supplemented with 50 mg L<sup>-1</sup> kanamycin. (G) The shoots were root regenerated on RM, including basic MS, MES (1.0 g L<sup>-1</sup>), sucrose (30 g L<sup>-1</sup>), agar (9.0 g L<sup>-1</sup>), coconut water (100 mL L<sup>-1</sup>), and the addition of 0.5 mg L<sup>-1</sup> IBA, and 50 mg L<sup>-1</sup> kanamycin; (H) The seedlings were transferred to pots contained a mixture of 2 soil:1 rice husk biochar:2 coir.

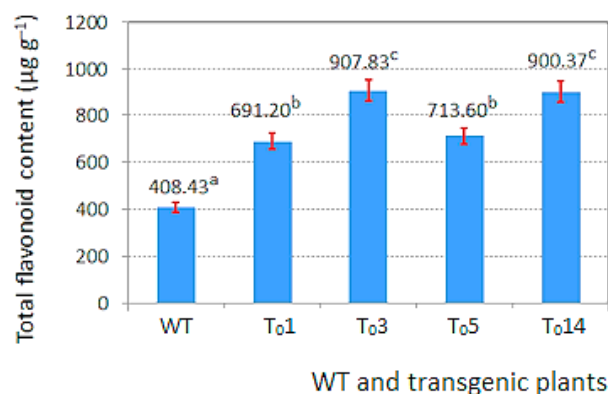

**Figure S3.** Total flavonoid content ( $\mu\text{g g}^{-1}$ ) of four transgenic tobacco lines, T<sub>01</sub>, T<sub>03</sub>, T<sub>05</sub>, and T<sub>014</sub>, and WT plants. WT: non-transformed plants; T<sub>01</sub>, T<sub>03</sub>, T<sub>05</sub>, T<sub>014</sub>: the T<sub>0</sub> GM tobacco lines. The letters a, b and c on the columns represent difference with  $P < 0.001$ ;  $n = 3$ .

**Table S1.** Fifteen plants in the top 100 blast hits of F3'5'H (<https://blast.ncbi.nlm.nih.gov/Blast.cgi>)

| Order | Species                                               | Accession         | Query Cover | Total Score | % identity |
|-------|-------------------------------------------------------|-------------------|-------------|-------------|------------|
| 1     | <i>Aconitum carmichaelii</i>                          | Quan Ba, Viet Nam |             |             |            |
| 2     | <i>Aconitum carmichaelii</i>                          | JN635708          | 100%        | 2765        | 99.47%     |
| 3     | <i>Aconitum carmichaelii</i> var. <i>truppelianum</i> | KY272865          | 100%        | 2699        | 98.69%     |
| 4     | <i>Aconitum vilmorinianum</i>                         | JQ806761          | 99%         | 2501        | 96.38%     |
| 5     | <i>Delphinium chefoense</i>                           | KX825847          | 94%         | 1701        | 88.12%     |
| 6     | <i>Delphinium grandiflorum</i>                        | AY856345          | 95%         | 1698        | 87.81%     |
| 7     | <i>D. grandiflorum</i> var. <i>chinense</i>           | AB818394          | 98%         | 1657        | 86.59%     |
| 8     | <i>Delphinium grandiflorum</i>                        | AB819289          | 98%         | 1652        | 86.52%     |
| 9     | <i>Clematis patens</i>                                | LC169756          | 93%         | 876         | 77.90%     |
| 10    | <i>Epimedium sagittatum</i>                           | HM011055          | 91%         | 512         | 73.65%     |
| 11    | <i>Catharanthus roseus</i>                            | AJ011862          | 80%         | 343         | 72.56%     |
| 12    | <i>Solanum lycopersicum</i>                           | EU626067          | 85%         | 278         | 70.88%     |
| 13    | <i>Solanum lycopersicum</i>                           | NM_001247911      | 85%         | 267         | 70.77%     |
| 14    | <i>Solanum lycopersicum</i>                           | GQ904194          | 33%         | 200         | 73.89%     |
| 15    | <i>Theobroma cacao</i>                                | XM_018120633      | 2%          | 54.7        | 92.11%     |

## References

1. Czemmel, S.; Stracke, R.; Weisshaar, B.; Cordon, N.; Harris, N.; Walker, A.; Robinson, S.; Bogs, J. The grapevine R2R3-MYB transcription factor VvMYB1 regulates flavonol synthesis in developing grape berries. *Plant Physiol.* **2009**, *151*, 1513–1530, doi:10.1104/pp.109.142059.
2. Shimada, Y.; Nakano-Shimada, R.; Ohbayashi, M.; Okinaka, Y.; Kiyokawa, S.; Kikuchi, Y. Expression of chimeric P450 genes encoding flavonoid-3', 5'-hydroxylase in transgenic tobacco and petunia plants. *FEBS Lett.* **1999**, *461*, 241–245, doi:10.1016/s0014-5793(99)01425-8.
3. Zabala, G.; Zou, J.; Tuteja, J.; Gonzalez, D.; Clough, S.J.; Vodkin, L. Transcriptome changes in the phenylpropanoid pathway of *Glycine max* in response to *Pseudomonas syringae* infection. *BMC Plant Biol.* **2006**, *6*, doi:10.1186/1471-2229-6-26.
